# Supplementary material for: Mortality of site-specific cancer in patients with schizophrenia: a systematic review and meta-analysis
Source: Springer Nature journal article supplement (doi:10.1186/s12888-019-2332-z), 2019-10-28
Supplement: MOESM1 [file 17319518]

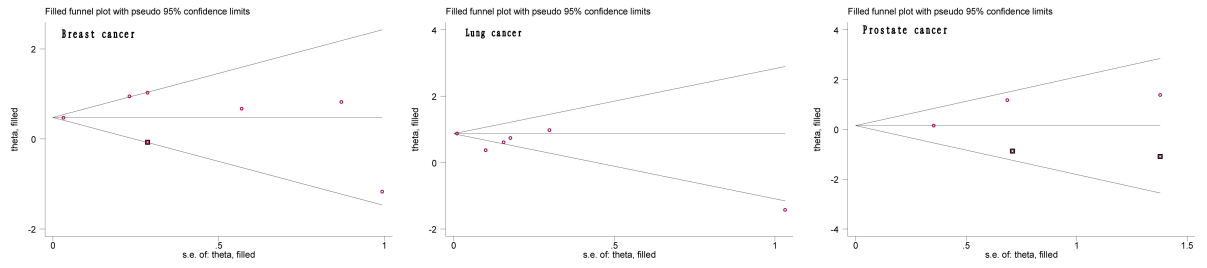

**Fig. S1** Metatrim test of studies included in meta-analysis of breast, lung and prostate cancer

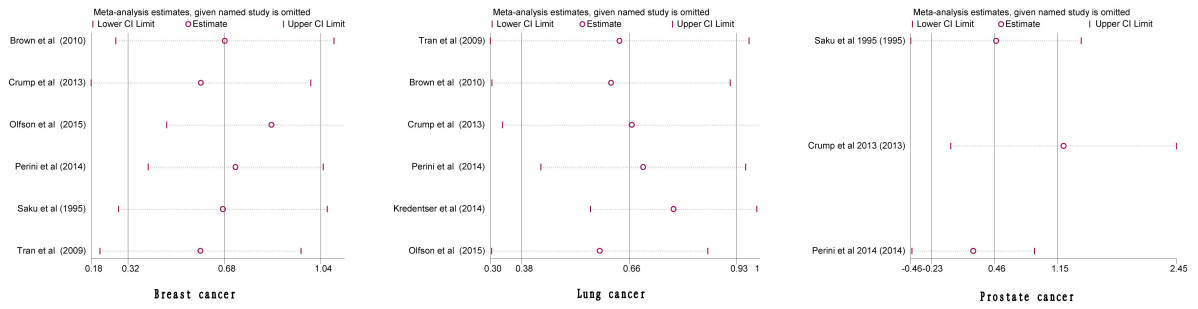

**Fig. S2** Metaninf test of studies included in meta-analysis of breast, lung and prostate cancer
